# Supplementary material for: α1-adrenergic stimulation increases ventricular action potential duration in the intact mouse heart
Source: Atypon-hosted journal article supplement (doi:10.1139/facets-2020-0081), 2021-01-01
Supplement: facets-2020-0081_supplement1.pdf [file facets-2020-0081_supplement1.pdf]

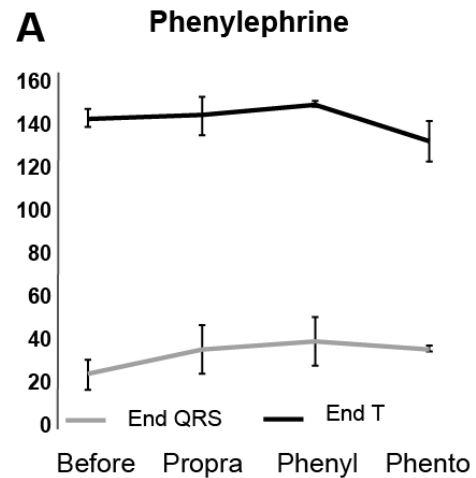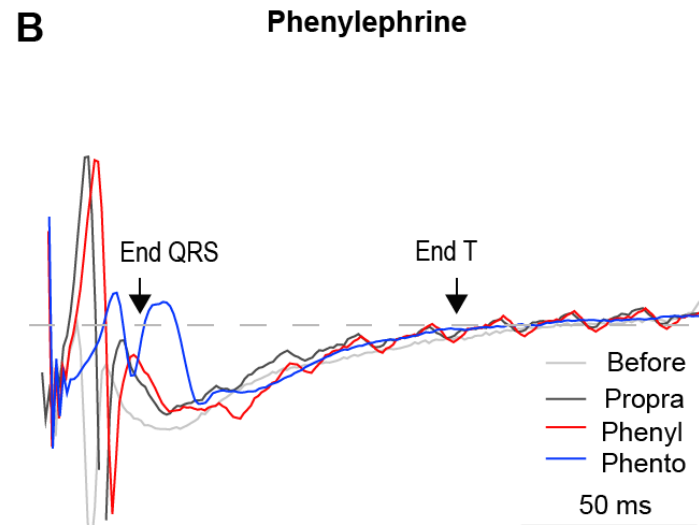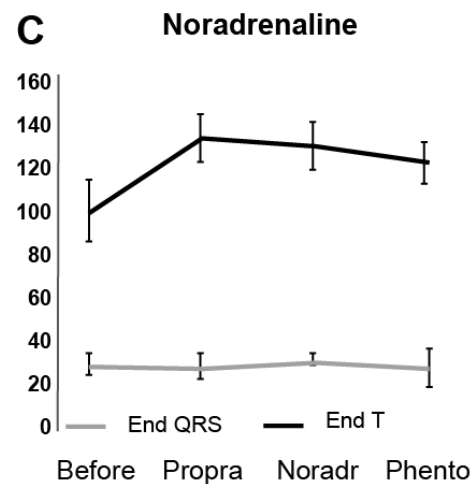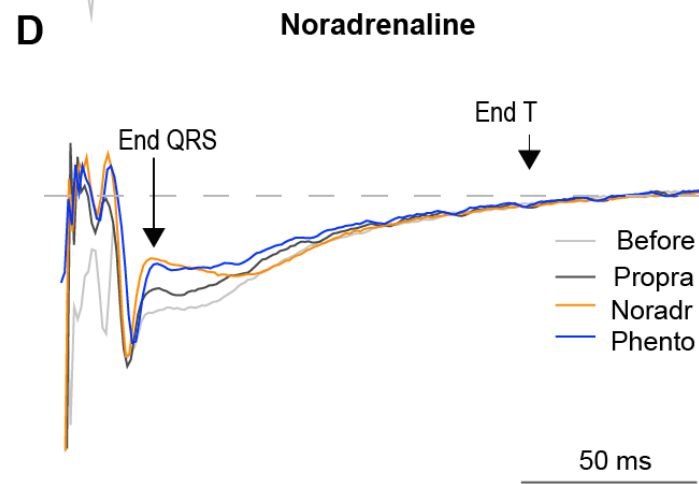

**Supplementary Figure 1.**  $\alpha_1$ -adrenergic stimulation did not change QT time during apical stimulation at 180 ms interval. The graphs show the moment of end of QRS complex (grey) and end T wave (black) during protocol 1 (**A**, N=4) and 2 (**C**, N=4). The traces in **B** and **D** show representative ECG recordings during protocol 1 and 2, respectively. There were no significant differences following administration of any drug (one-way repeated measurement ANOVA). Data are means  $\pm$  SEM.

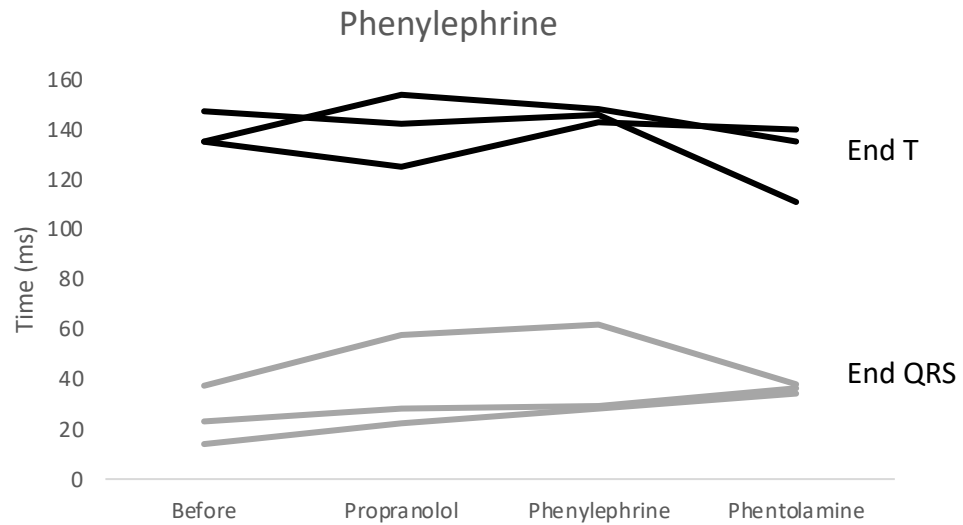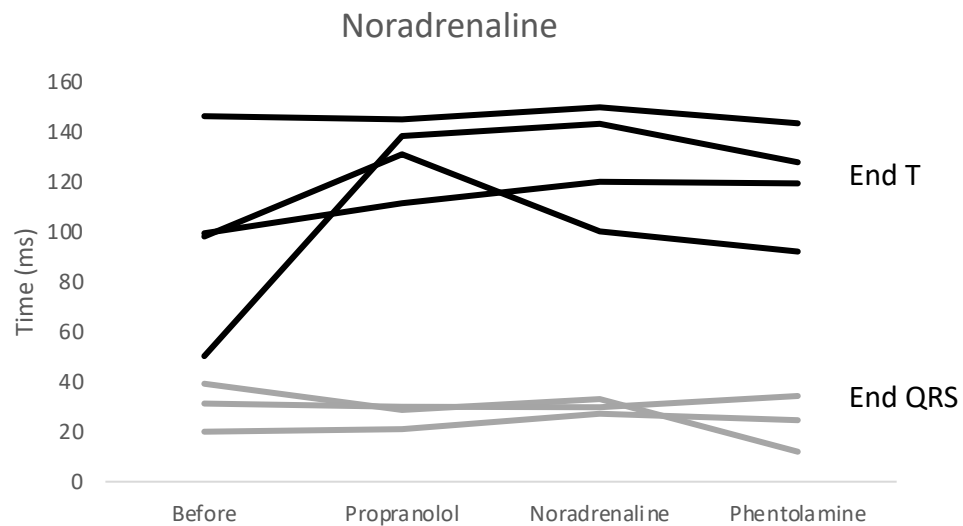

**Supplementary Figure 2.** Individual values for the moment of end of QRS complex (grey) and end T wave (black) corresponding with in text Supplementary Figure 1A and C. Please see Supplementary Figure 1 legend for full details.

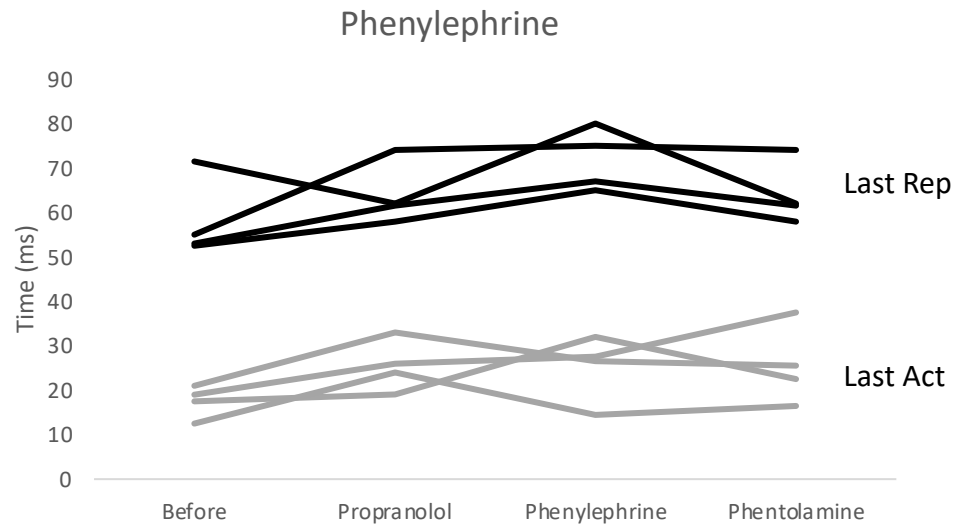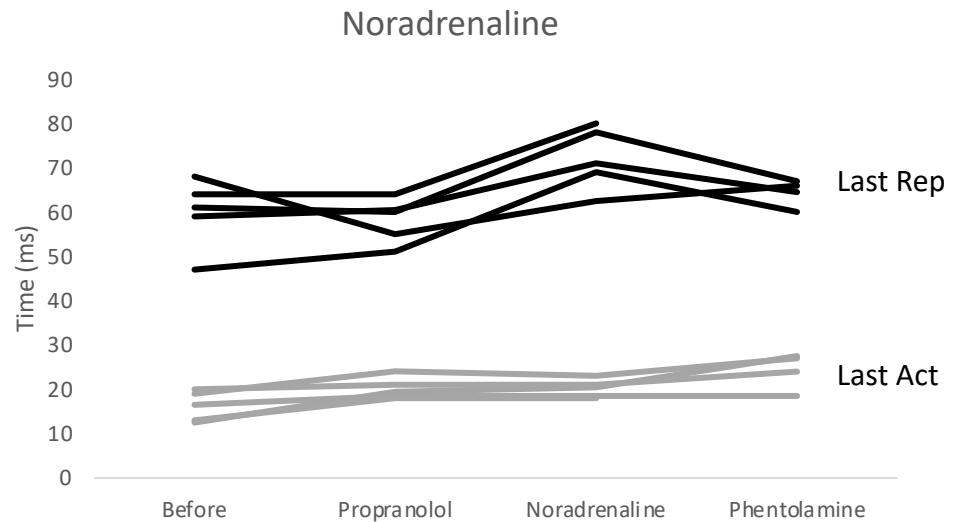

**Supplementary Figure 3.** Individual values for the time of final local activation (grey) and final local repolarization (black) corresponding with in text Figure 3. Please see Figure 3 legend for full details.

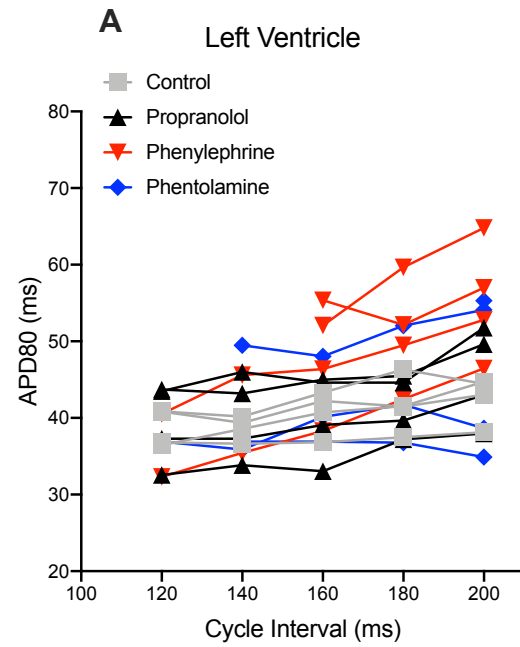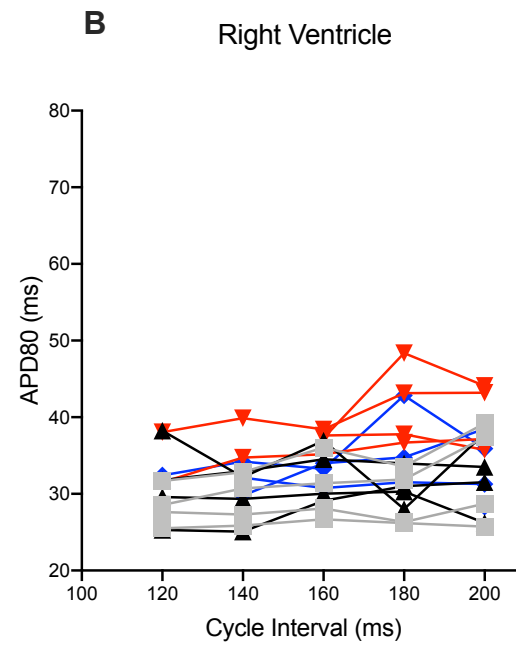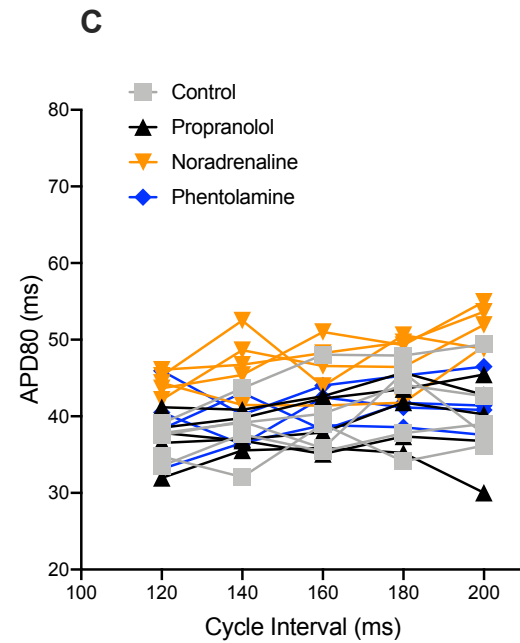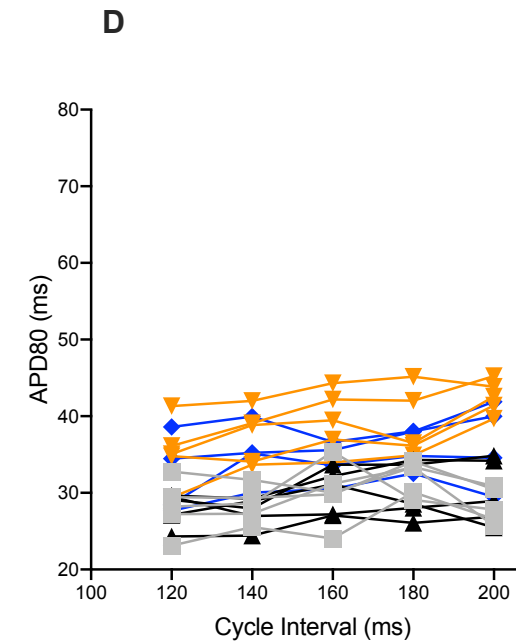

**Supplementary Figure 4.** Individual values for action potential duration at 80% repolarization (APD80) corresponding with in text Figure 5. Please see Figure 5 legend for full details.
